# Supplementary material for: Lifestyle Patterns and Weight Status in Spanish Adults: The ANIBES Study
Source: MDPI journal article supplement (doi:10.3390/nu9060606), 2017-06-14
Supplement: s1 [file s1]

**Supplementary Table S1 Food groups<sup>a</sup> and subgroups in the ANIBES Study**

|                                         |
|-----------------------------------------|
| <b>Grains</b>                           |
| Grains and flours                       |
| Bread                                   |
| Breakfast cereals and cereal bars       |
| Pasta                                   |
| Bakery and pastry                       |
| <b>Vegetables</b>                       |
| <b>Fruits</b>                           |
| <b>Oils and fats</b>                    |
| Olive oil                               |
| Other oils                              |
| Butter, margarine and shortening        |
| <b>Milk and dairy products</b>          |
| Milks                                   |
| Cheeses                                 |
| Yogurt and fermented milk               |
| Other dairy products                    |
| <b>Fish and Shellfish</b>               |
| <b>Meat and meat products</b>           |
| Meat                                    |
| Sausages and other meat products        |
| Viscera and spoils                      |
| <b>Eggs</b>                             |
| <b>Pulses</b>                           |
| <b>Sugars and sweets</b>                |
| Sugar                                   |
| Chocolates                              |
| Jams and other                          |
| Other sweets                            |
| <b>Appetizers</b>                       |
| <b>Ready-to-eat-meals</b>               |
| <b>Sauces and condiments</b>            |
| <b>Non-alcoholic beverage</b>           |
| Water                                   |
| Coffee and infusions                    |
| Sugar soft drinks                       |
| Non-sweetened soft drinks               |
| Sports Drinks                           |
| Energy drinks                           |
| Juices and nectars                      |
| Other drinks                            |
| <b>Alcoholic beverages</b>              |
| Low alcohol content beverages           |
| High alcohol content beverages          |
| <b>Supplements and meal replacement</b> |

<sup>a</sup> Olive oil: olive oil and virgin olive oil; Vegetables: All vegetables, including root vegetables and potatoes; Fruit: all fresh, canned, and dried fruits, including nuts and seeds; Pulses: green and dried pulses; Bread: all types of bread, including whole grain; Baked goods: Biscuits, sweet breads, and cakes; Sugar and sugary products: sugar, sweets, chocolates, confectionery, jam, marmalade, turrón; Milk: all types of milk; Cheese: all cheeses; Yoghurt and fermented milk: all yoghurt and fermented milk products; Meat and meat products: all meat and meat products; Cold and processed meats: sausages and other cold meats; Sugared soft drinks: any flavor sugared soft drinks and sodas; Juices: juices and nectars; Sauces and dressings: sauces, dressings, condiments, and spices.

**Supplementary Table S2.- Characteristics of the sample analyzed**

|                   |                       | Men |       | Women |       | All  |       | $\chi^2$ | P     |
|-------------------|-----------------------|-----|-------|-------|-------|------|-------|----------|-------|
|                   |                       | n   | %     | n     | %     | n    | %     |          |       |
| Age group         |                       |     |       |       |       |      |       |          |       |
|                   | 18- 30 y.             | 207 | 26.50 | 207   | 24.76 | 414  | 25.60 | 0.82     | 0.664 |
|                   | 31-49 y               | 378 | 48.40 | 407   | 48.68 | 785  | 48.55 |          |       |
|                   | 50-64 y               | 196 | 25.10 | 222   | 26.56 | 418  | 25.85 |          |       |
|                   | Total                 | 781 | 100   | 836   | 100   | 1617 | 100   |          |       |
| Educational level |                       |     |       |       |       |      |       |          |       |
|                   | Primary of less       | 207 | 26.50 | 226   | 27.03 | 433  | 26.78 | 0.31     | 0.856 |
|                   | Secondary             | 389 | 49.81 | 405   | 48.44 | 794  | 49.10 |          |       |
|                   | Higher                | 185 | 23.69 | 205   | 24.52 | 390  | 24.12 |          |       |
|                   | Total                 | 781 | 100   | 836   | 100   | 1617 | 100   |          |       |
| Geographical area |                       |     |       |       |       |      |       |          |       |
|                   | North-northwest       | 136 | 17.4  | 143   | 17.1  | 279  | 17.3  | 3.05     | 0.385 |
|                   | Eastern-Mediterranean | 255 | 32.7  | 292   | 34.9  | 547  | 33.8  |          |       |
|                   | Center                | 197 | 25.2  | 182   | 21.8  | 379  | 23.4  |          |       |
|                   | South                 | 193 | 24.7  | 219   | 26.2  | 412  | 25.5  |          |       |
| BMI status        |                       |     |       |       |       |      |       |          |       |
|                   | Normal weight         | 245 | 31.37 | 408   | 48.80 | 653  | 40.38 | 51.08    | 0.000 |
|                   | Overweight            | 339 | 43.41 | 275   | 32.89 | 614  | 37.97 |          |       |
|                   | Obese                 | 197 | 25.22 | 153   | 18.30 | 350  | 21.65 |          |       |
|                   | Total                 | 781 | 100   | 836   | 100   | 1617 | 100   |          |       |

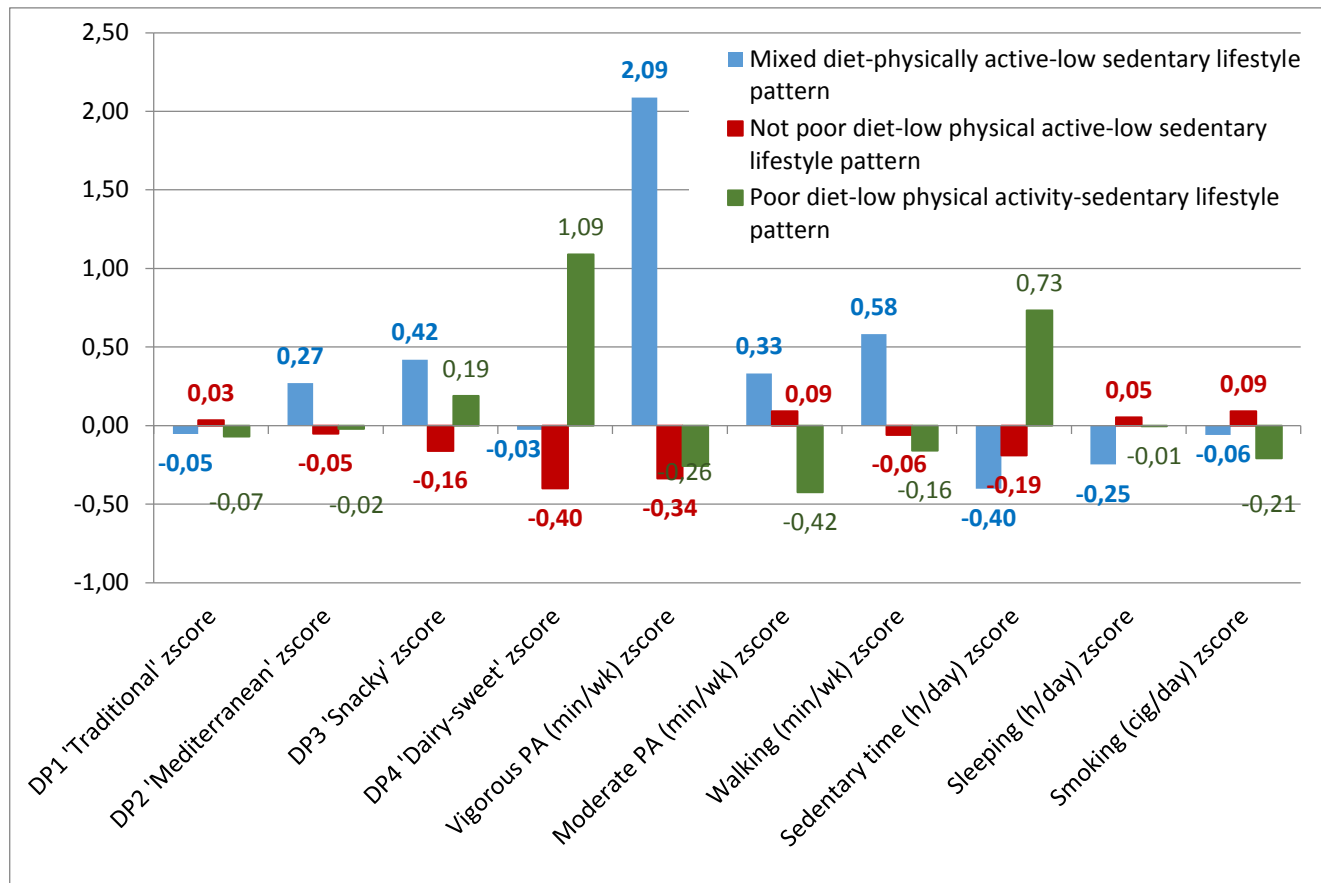

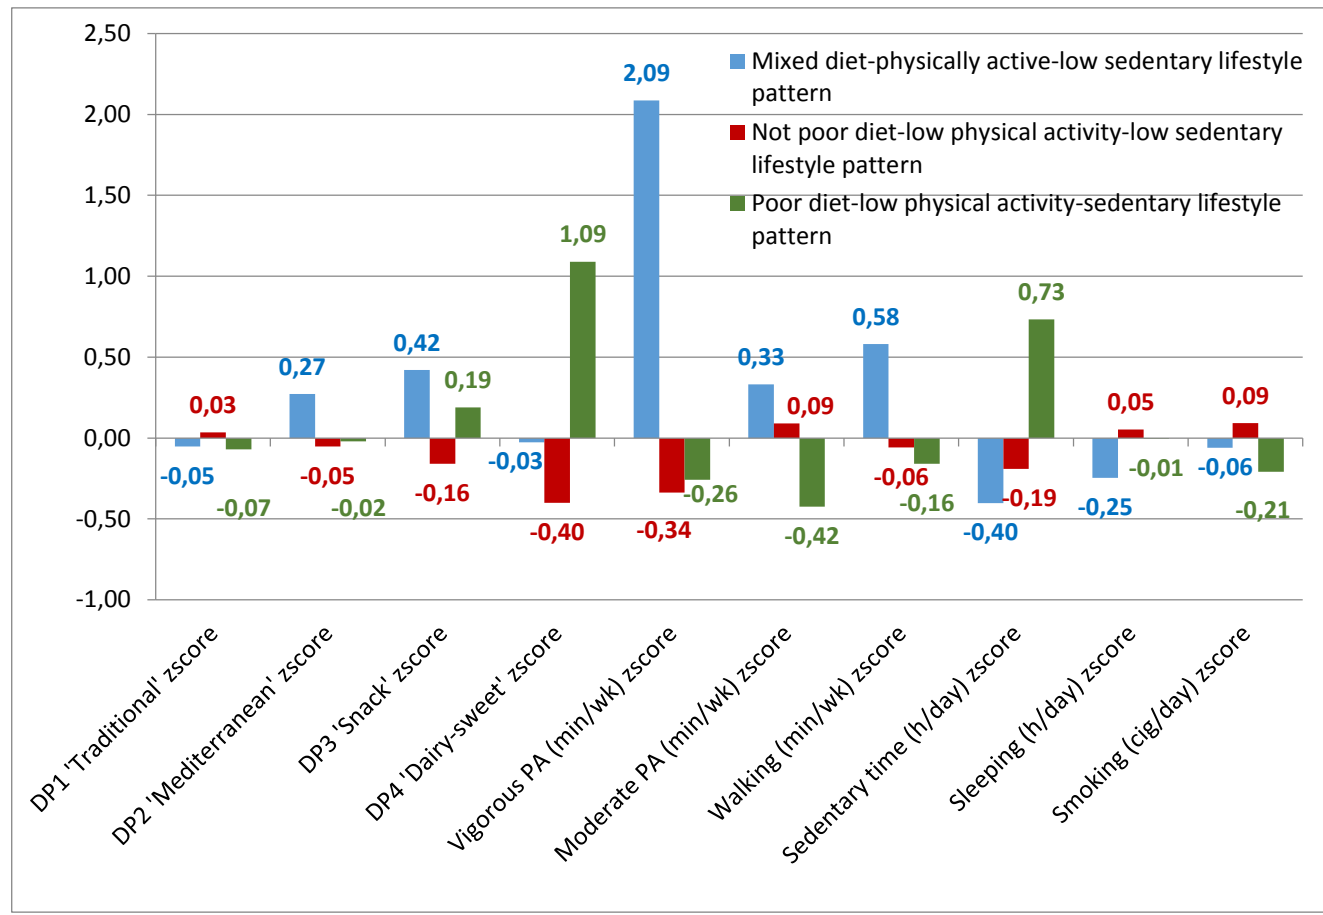

Figure S1.- Final cluster center scores for Lifestyle patterns identified in Spanish adults aged 18-64y in the ANIBES study
